# Supplementary material for: Two new types of π-conjugation between a fullerene sphere and an addend
Source: Royal Society of Chemistry journal article supplement (doi:10.1039/b920339g), 2010-01-01

Supplementary Information

## Two new Types of $\pi$ -Conjugation between a Fullerene Sphere and an Addend.

Floris B. Kooistra, Tessa M. Leuning, Enrique Maroto Martinez, and Jan C. Hummelen

*Molecular Electronics, Zernike Institute for Advanced Materials & Stratingh Institute for Chemistry, University of Groningen, Nijenborgh 4, 9747 AG Groningen, The Netherlands*

### Table of Contents:

|                                  |      |
|----------------------------------|------|
| General Procedure                | p 1  |
| UV/VIS Spectroscopy              | p 3  |
| $^1\text{H}$ NMR Spectroscopy    | p 10 |
| $^{13}\text{C}$ NMR Spectroscopy | p 15 |
| Mass Spectroscopy                | p 16 |

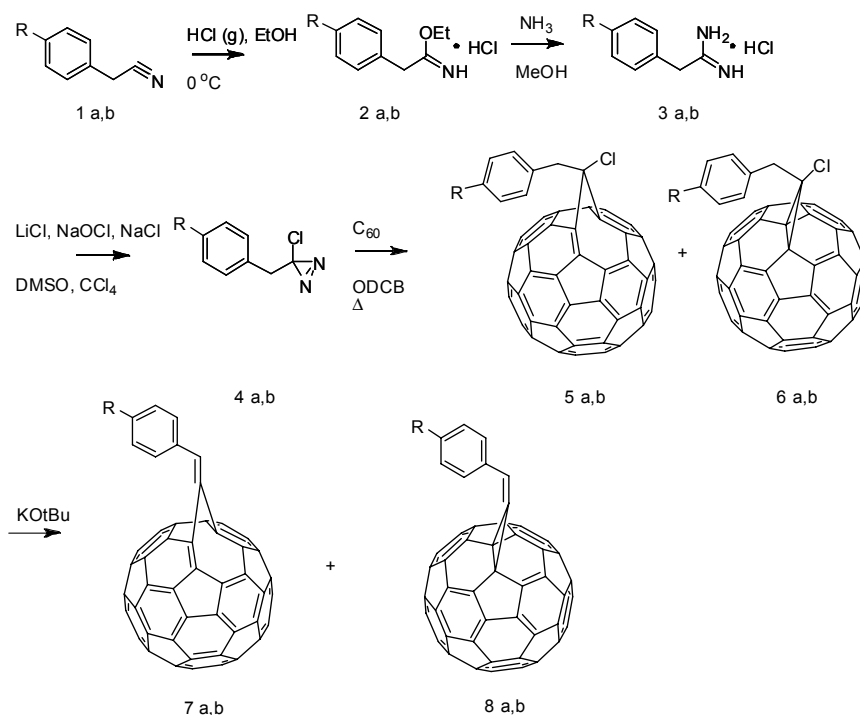

**Figure 1:** General Synthetic Scheme (a: R=H, b: R=NO<sub>2</sub>)

### General Procedure for Diazirine addition:

A flame-dried three-necked flask equipped with thermometer, condenser,  $\text{N}_2$ -inlet, and stirring egg was charged with a solution of  $\text{C}_{60}$  in ODCB (20 mg/ml). This solution was thoroughly degassed by 3  $\text{N}_2$ /vacuum purges. The diazirine (5 eq.) was added at once to this solution. The resulting reaction mixture was heated to  $60\text{ }^\circ\text{C}$ . The reaction was followed by HPLC and stopped at the following conversion:  $\text{C}_{60}$  : 50%, [6,6]-adduct : 32 % and [5,6]-adduct : 5%. The different products were then isolated by preparative HPLC using a Buckyclutcher column and cyclohexane/toluene (1:1) as the eluent.

**General Procedure for the HCl elimination reaction:**

A flame dried flask was charged with a solution of fullerene in ODCB (1mg/ml). This solution was heated to 50 °C and KOtBu (2 eq) was then added at once. The reaction was followed by HPLC. When a conversion of around 85% was reached, the reaction was stopped and the products were purified by the same preparative HPLC procedure as before.

**1-benzyl-1-chlorohomofullerene 5a:** IR (KBr) =  $\nu$  (cm<sup>-1</sup>): 3425 (s), 3060 (m), 3028 (s), 2923 (s), 2851 (m), 1722 (m), 1601 (m), 1495 (s), 1454 (s), 1433 (s), 1380 (m), 1260 (w), 1174 (w), 1033 (m), 747 (s), 697 (s), 527 (s). UV/Vis (toluene/cyclohexane 1:1);  $\lambda$  (nm): 537, 602. Mass m/z calcd. for C<sub>68</sub>H<sub>7</sub>Cl: 858.02. Found: 858.8

**1-(p-nitrobenzyl)-1-chlorohomofullerene 5b:** UV/Vis (toluene/cyclohexane 1:1);  $\lambda$  (nm): 540, 603. Mass m/z calcd. for C<sub>68</sub>H<sub>6</sub>ClNO<sub>2</sub>: 903.01, Found: 903.8

**1-benzyl-1-chlorocyclopropafullerene 6a:** IR (KBr) =  $\nu$  (cm<sup>-1</sup>): 3426 (s), 3026 (w), 1602 (w), 1494 (m), 1465 (m), 1452 (m), 1429 (m), 1385 (w), 1186 (m), 698 (m), 577 (m), 526 (s). <sup>1</sup>H NMR (CS<sub>2</sub> with D<sub>2</sub>O insert, 300 MHz);  $\delta$  (ppm): 7.78 (d, *J* = 6.9 Hz, 2H), 7.47–7.7.56 (m, 3H), 4.67 (s, 2H). <sup>13</sup>C NMR (D<sub>2</sub>O/CS<sub>2</sub>, 300 MHz);  $\delta$  (ppm): 39.1, 57.3, 78.8, 127.3, 128.4, 129.7, 130.1, 135.2, 137.0, 138.7, 140.6, 140.9, 141.4, 141.7, 141.8, 141.9, 142.7, 142.9, 143.2, 144.0, 144.1, 144.2, 144.4, 144.5, 144.6, 144.7, 144.8, 145.3, 145.6. UV/Vis (toluene/cyclohexane 1:1);  $\lambda$  (nm): 431, 497, 692. Mass m/z calcd. for C<sub>68</sub>H<sub>7</sub>Cl: 858.02. Found: 858.6.

**1-(p-nitrobenzyl)-1-chlorocyclopropafullerene 6b:** IR (KBr) =  $\nu$  (cm<sup>-1</sup>): 3424 (s), 1601 (m), 1517 (s), 1430 (m), 1340 (s), 854 (w), 578 (w), 526 (s). <sup>1</sup>H NMR (CS<sub>2</sub> with D<sub>2</sub>O insert, 400 MHz);  $\delta$  (ppm): 8.45 (d, *J* = 8.8 Hz, 2H), 8.06 (d, *J* = 8.8 Hz, 2H), 4.58 (s, 2H). UV/Vis (toluene/cyclohexane 1:1);  $\lambda$  (nm): 438, 490, 685. Mass m/z calcd. for C<sub>68</sub>H<sub>6</sub>ClNO<sub>2</sub>: 903.01. Found: 903.3.

**Benzylidenehomofullerene 7a:** UV/Vis (toluene/cyclohexane 1:1);  $\lambda$  (nm): 548, 603, 664. Mass m/z calcd. for C<sub>68</sub>H<sub>6</sub>: 822.04. Found: 822.7.

**p-Nitrobenzylidenehomofullerene 7b:** UV/Vis (toluene/cyclohexane 1:1);  $\lambda$  (nm): 547. Mass m/z calcd. for C<sub>68</sub>H<sub>5</sub>NO<sub>2</sub>: 867.03. Found: 867.8.

**Benzylidenecyclopropafullerene 8a:** IR (KBr) =  $\nu$  (cm<sup>-1</sup>): 3026 (s), 1538 (w), 1496 (w), 1466 (m), 1452 (m), 1429 (s), 1259 (m), 1188 (s), 1076 (m), 915 (w), 879 (w), 752 (m), 743 (m), 688 (s), 525 (s), 518 (s). <sup>1</sup>H NMR (CS<sub>2</sub> with D<sub>2</sub>O insert, 300 MHz);  $\delta$  (ppm): 8.1 (d, *J* = 7.7 Hz, 2H), 7.63 (t, *J* = 6.9 Hz, 2H), 7.54–7.58 (m, 1H), 7.47 (s, 1H). UV/Vis (toluene/cyclohexane 1:1);  $\lambda$  (nm): 427, 515, 690. Mass m/z calcd. for C<sub>68</sub>H<sub>6</sub>: 822.04. Found: 822.7.

**p-Nitrobenzylidenecyclopropafullerene 8b:** IR (KBr) =  $\nu$  (cm<sup>-1</sup>): 3446 (s), 1597 (m), 1516 (s), 1429 (m), 1340 (s), 1109 (m), 526 (s). <sup>1</sup>H NMR (CS<sub>2</sub> with D<sub>2</sub>O insert, 400 MHz);  $\delta$  (ppm): 8.49 (d, *J* = 8.8 Hz, 2H), 8.30 (d, *J* = 8.8 Hz, 2H), 7.58 (s, 1H). UV/Vis (toluene/cyclohexane 1:1);  $\lambda$  (nm): 511. Mass m/z calcd. for C<sub>68</sub>H<sub>5</sub>NO<sub>2</sub>: 867.03. Found: 867.7.

**UV/VIS spectroscopy**

**Compound 5a**

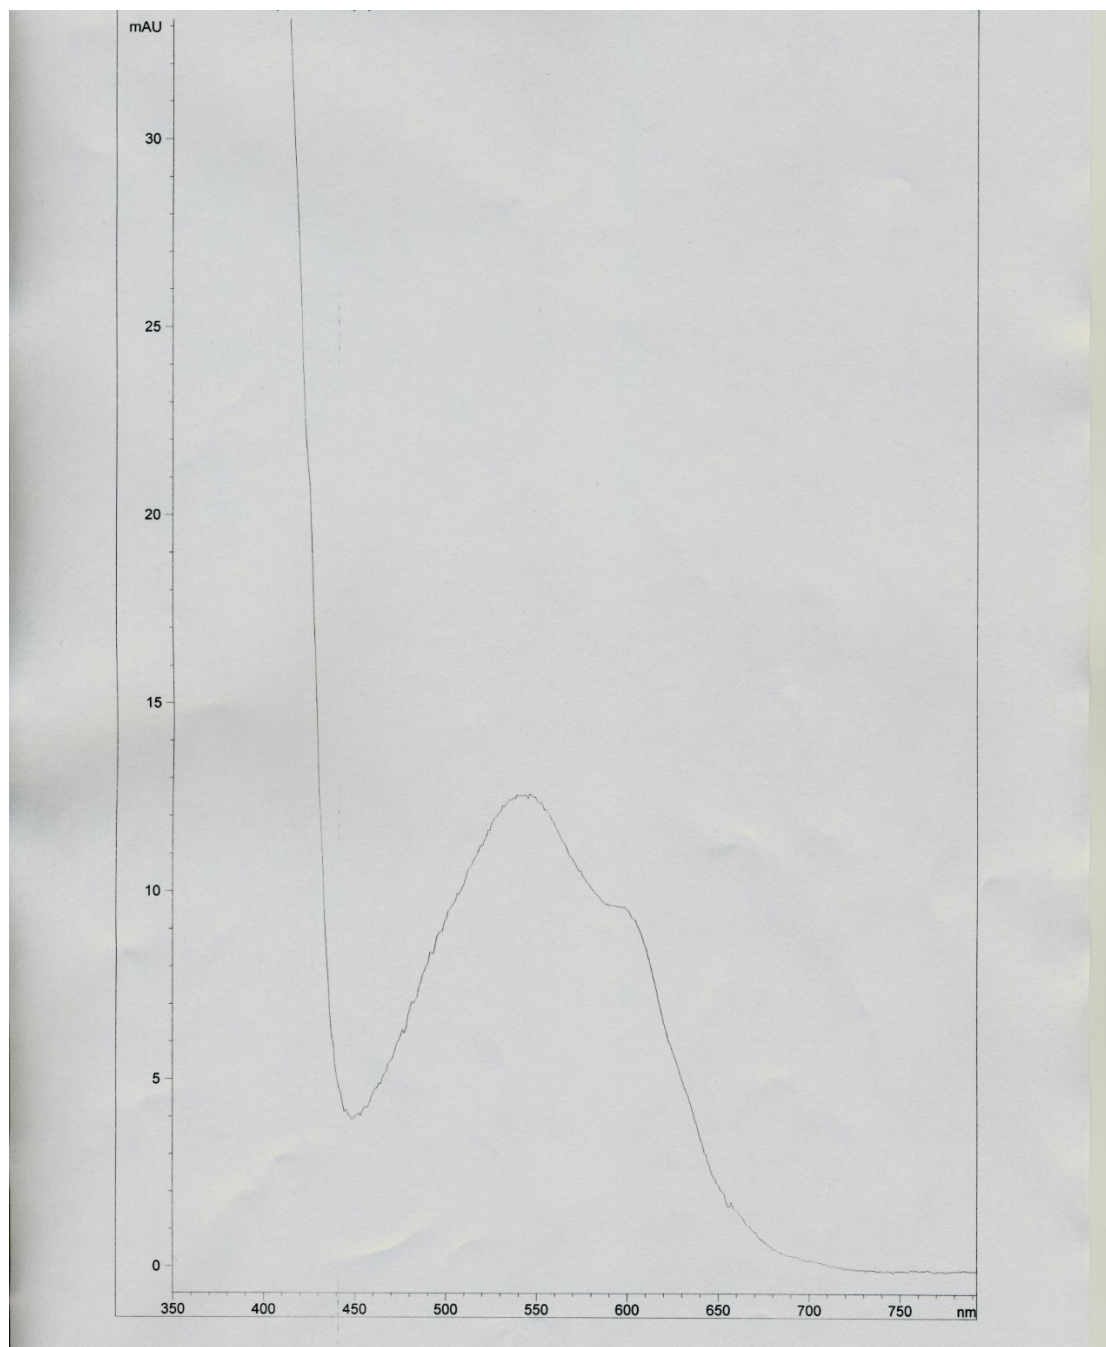

### Compound 5b

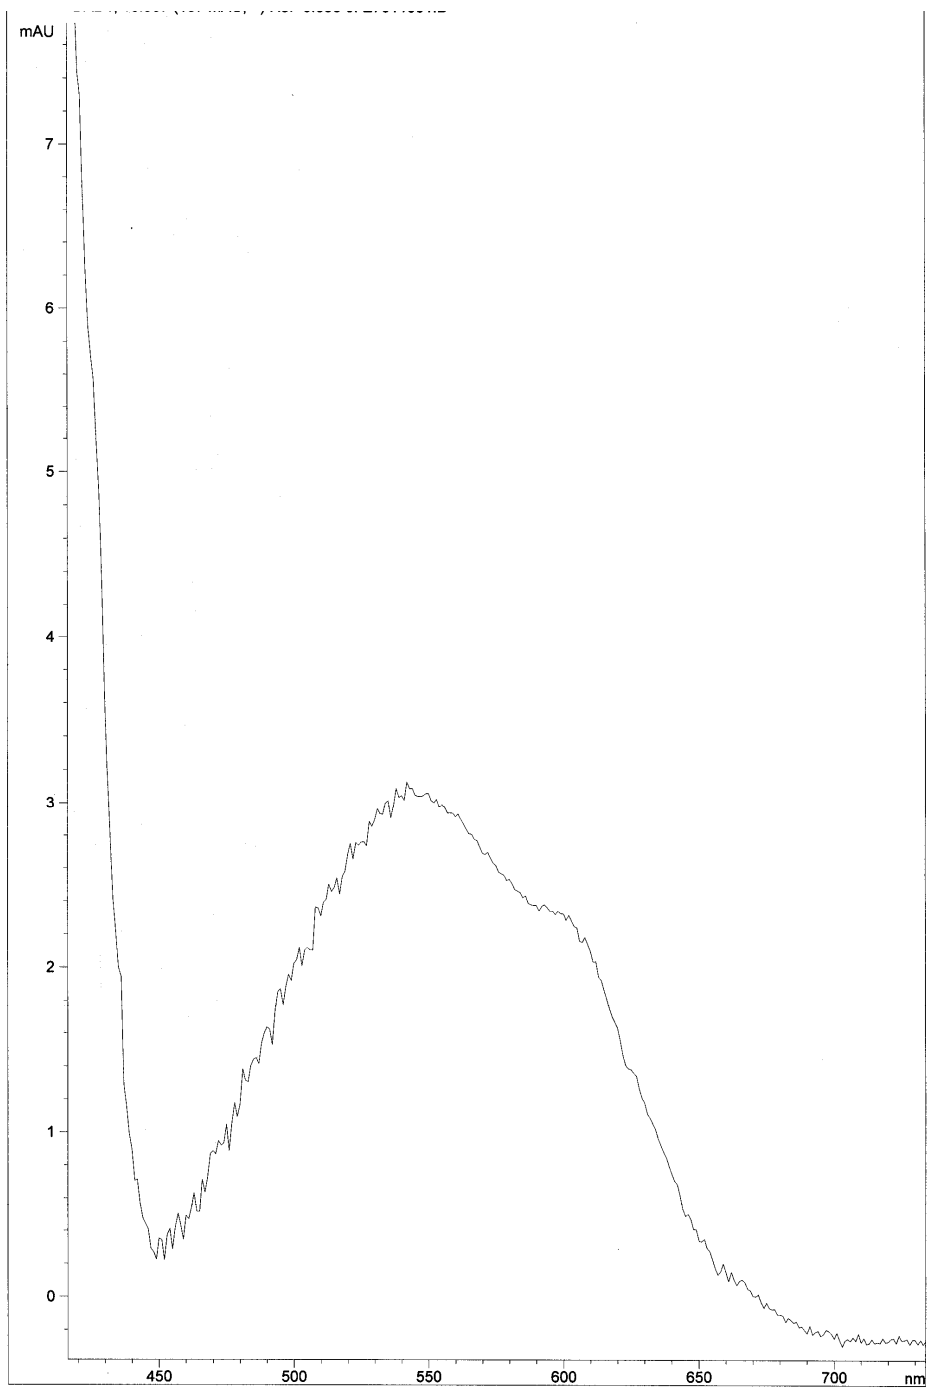

### Compound 6a

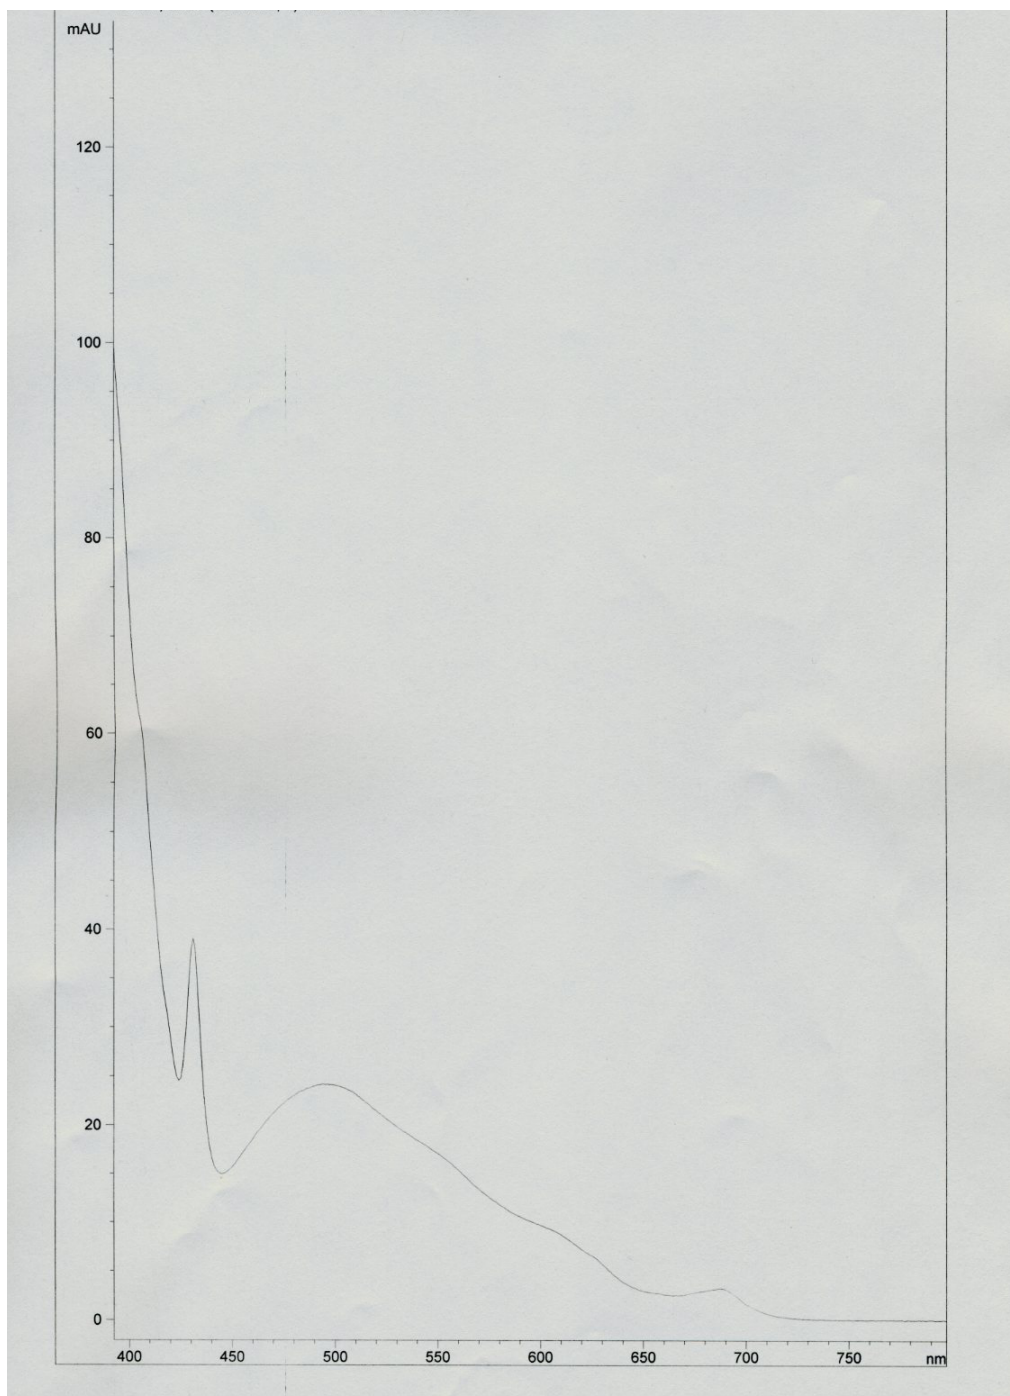

### Compound 6b

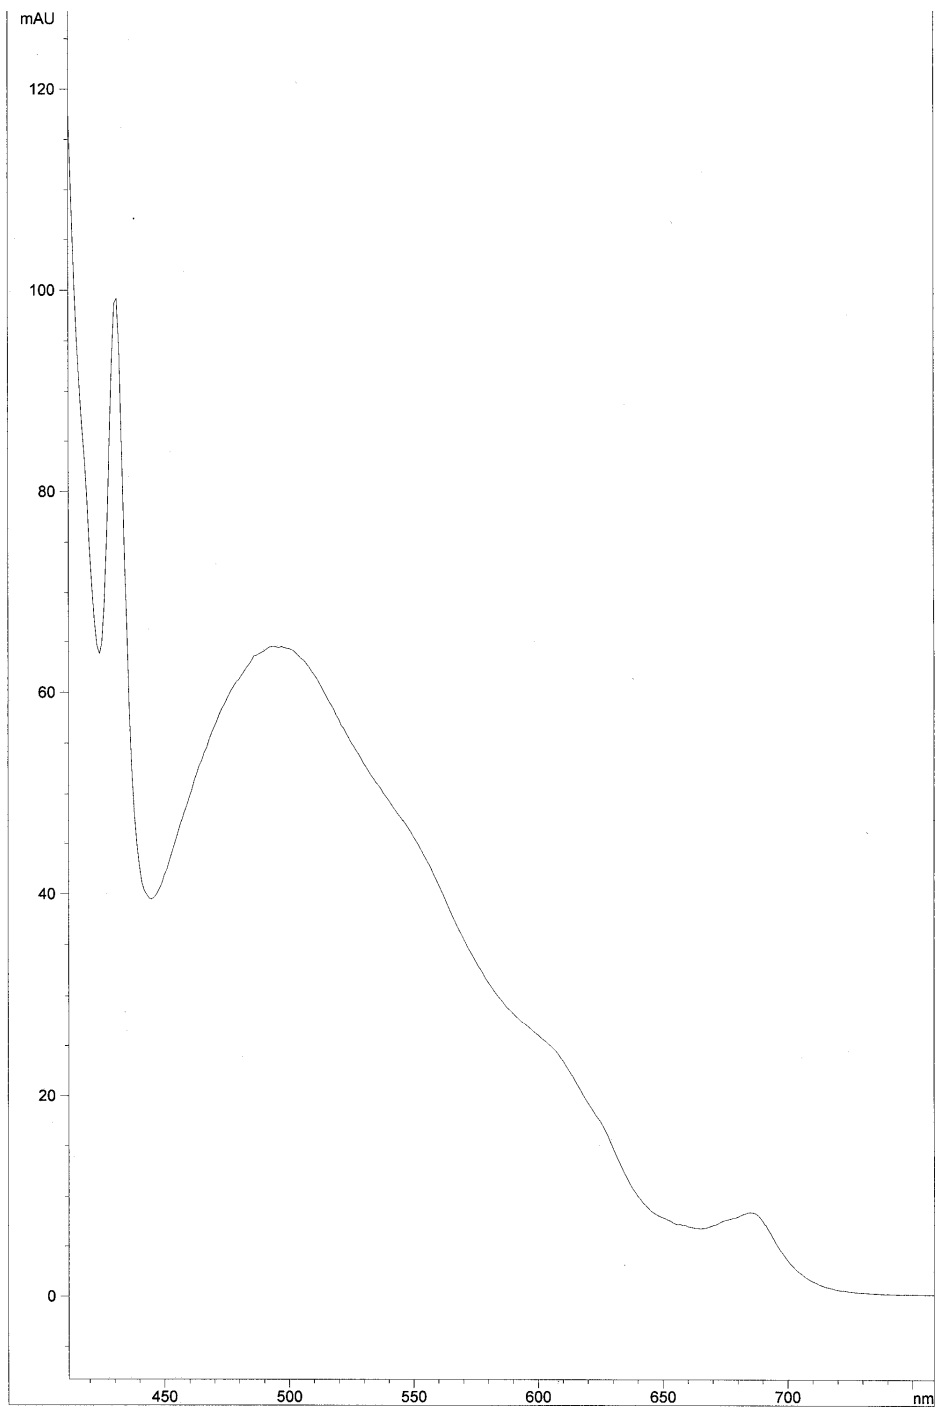

### Compound 7a

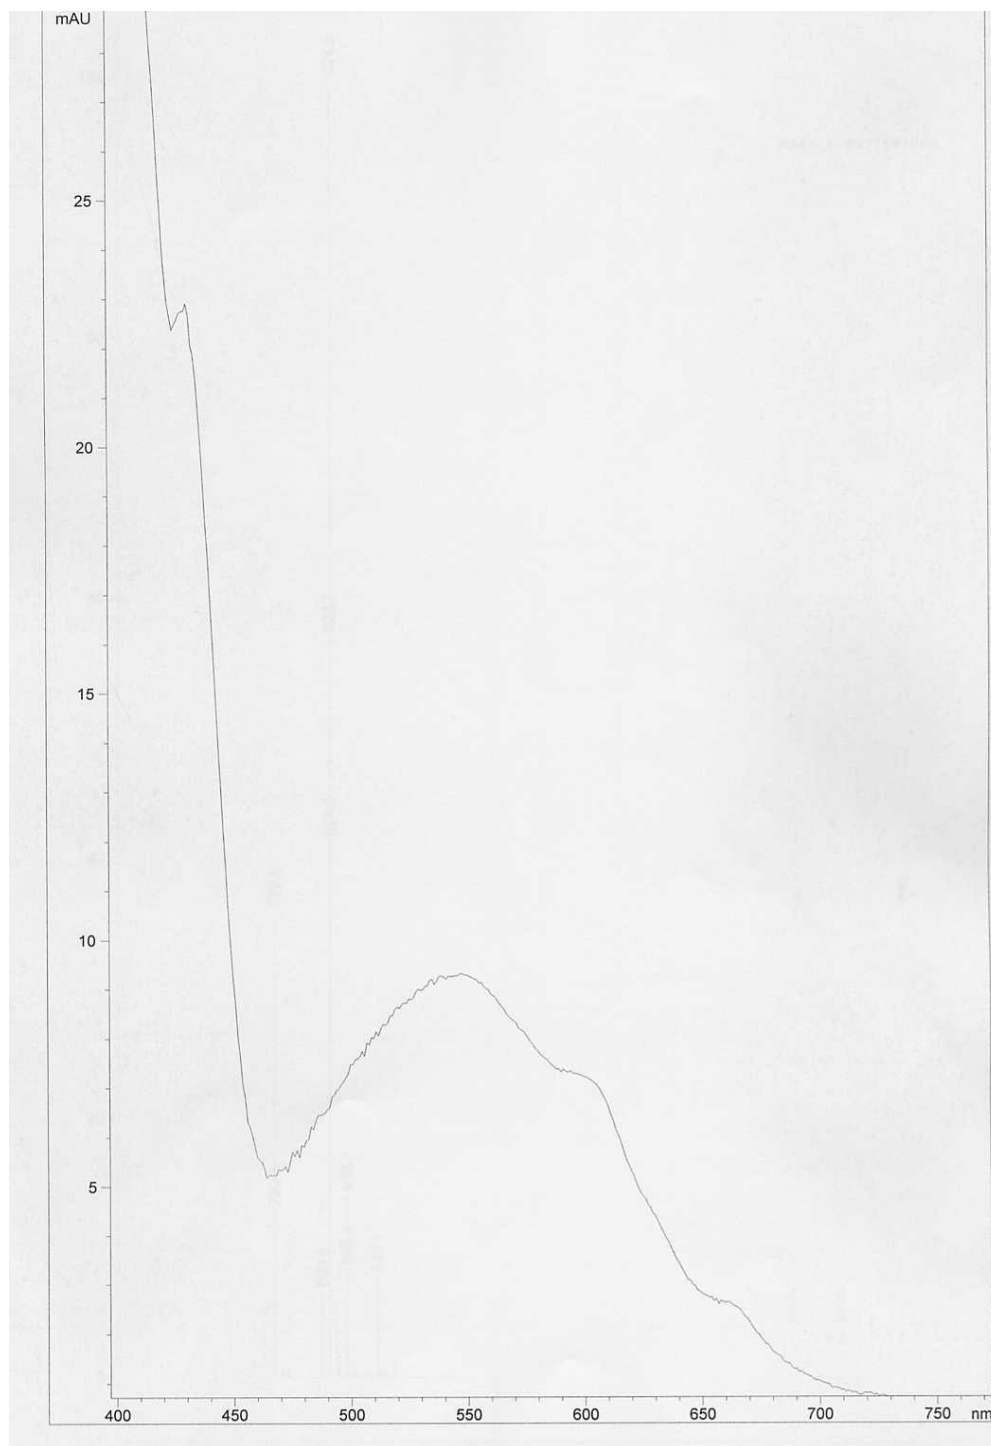

### Compound 7b

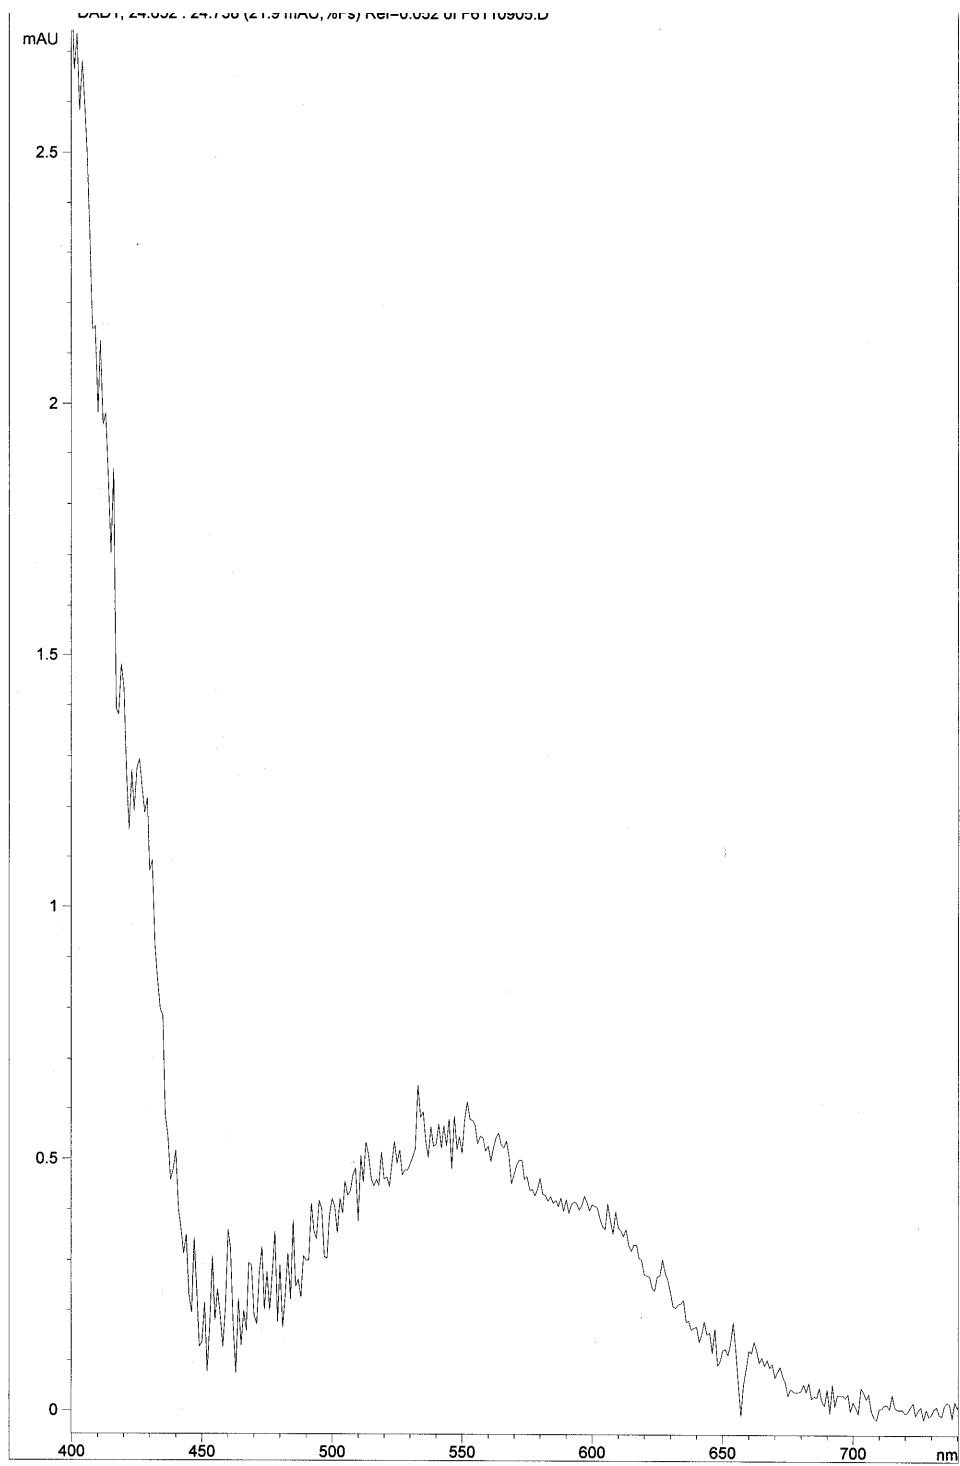



### Compound 8a

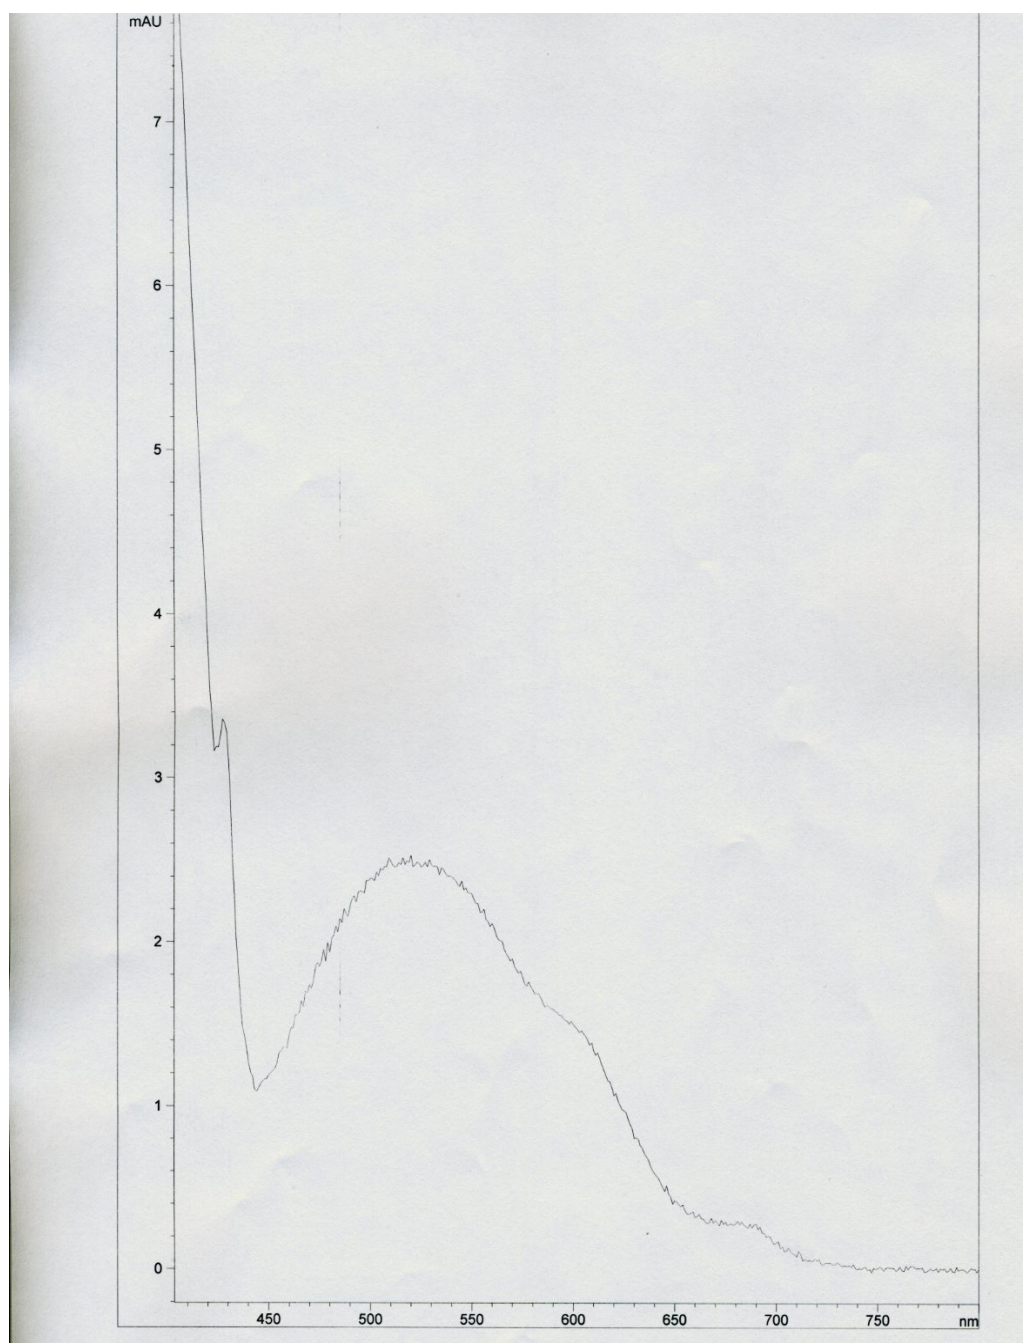

### Compound 8b

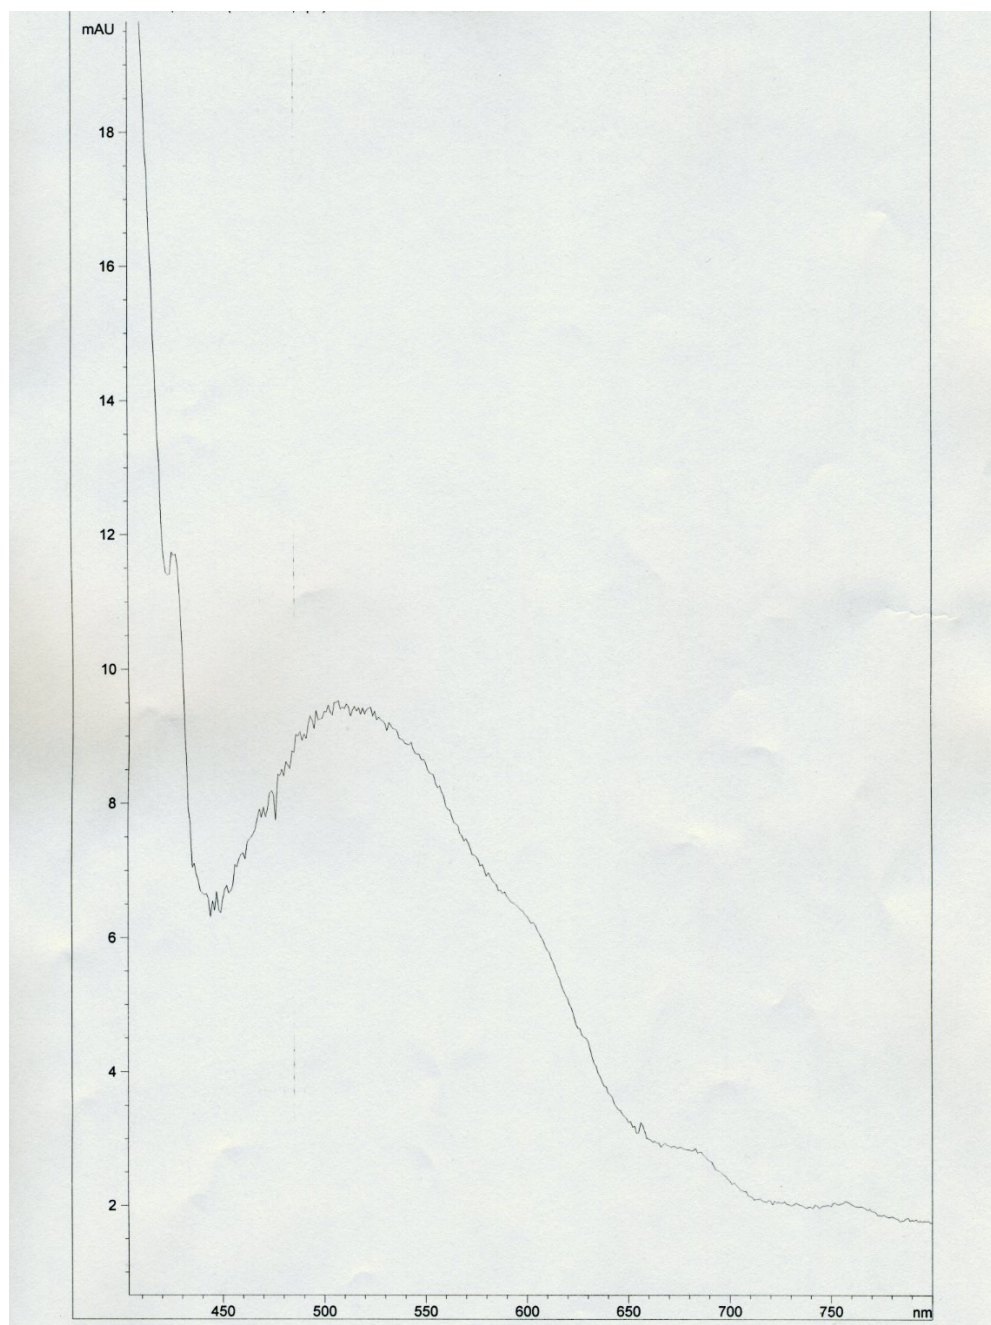

## <sup>1</sup>H NMR Spectroscopy

### Compound 6a

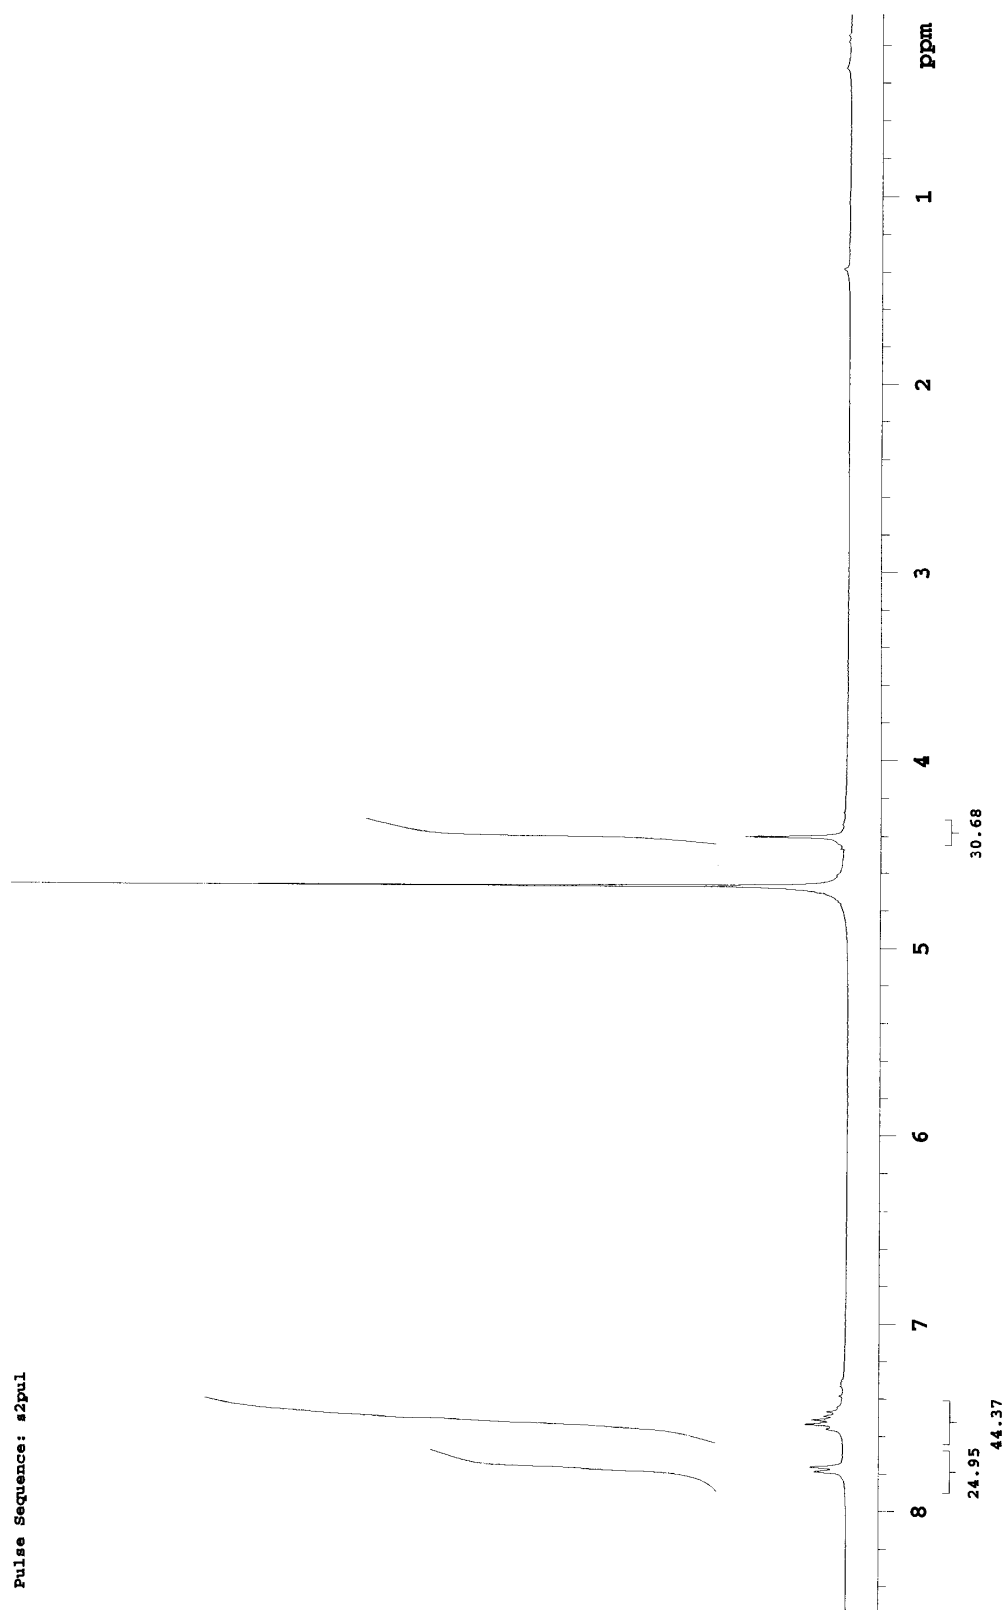

### Compound 8a

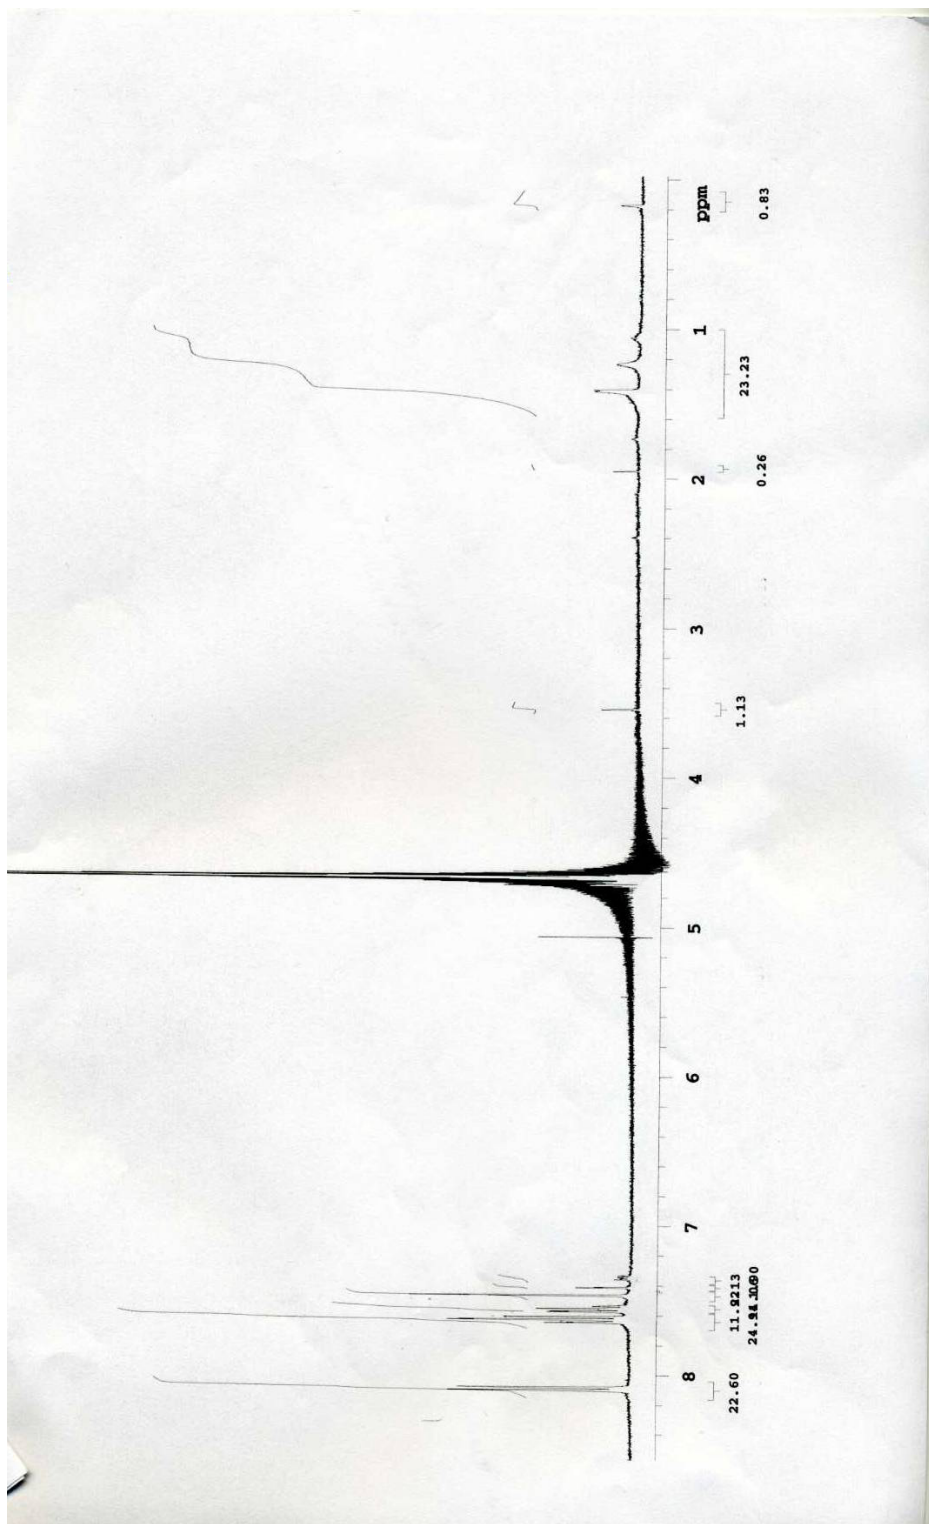

**Compound 6b**

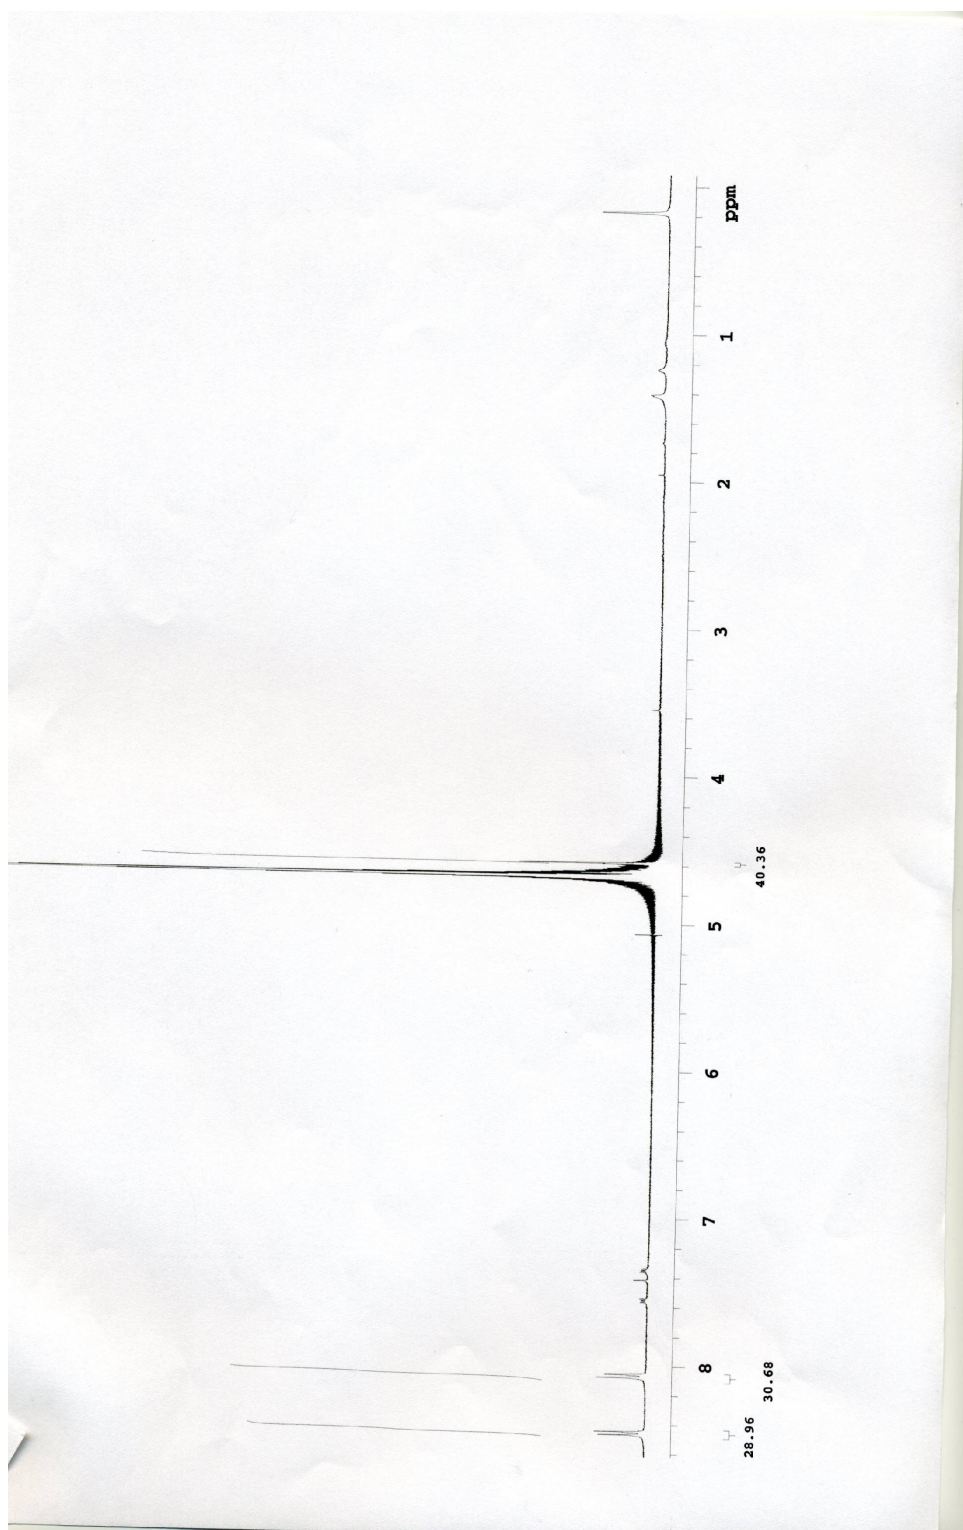

### Compound 8b

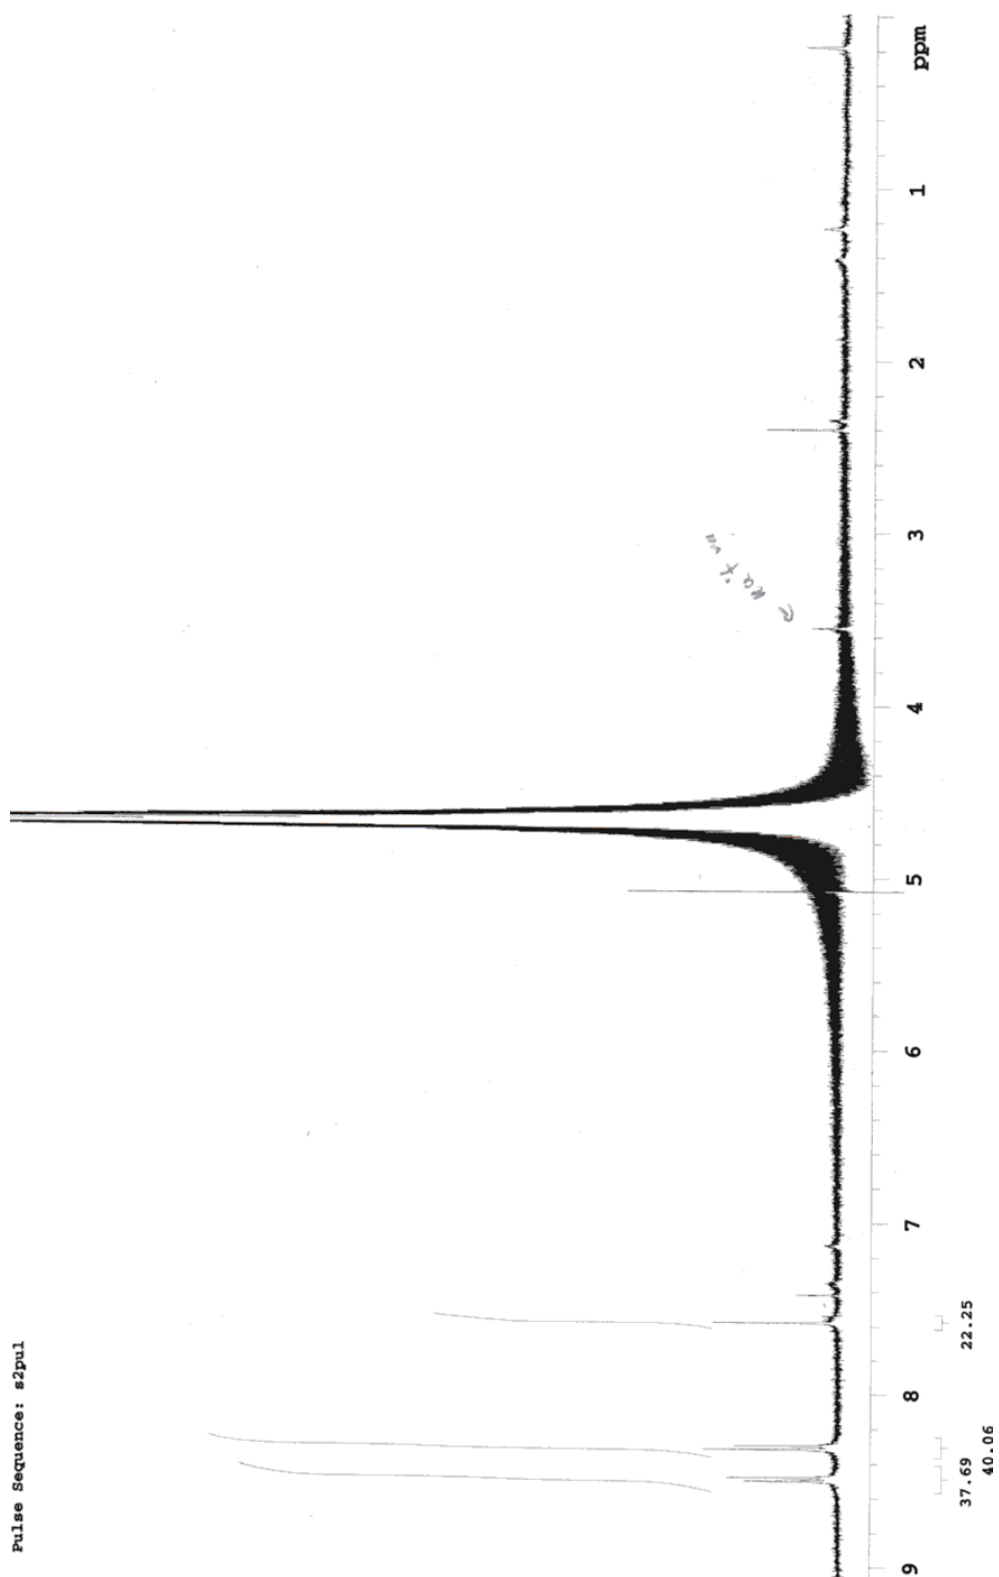

**<sup>13</sup>C NMR spectroscopy**

**Compound 6a**

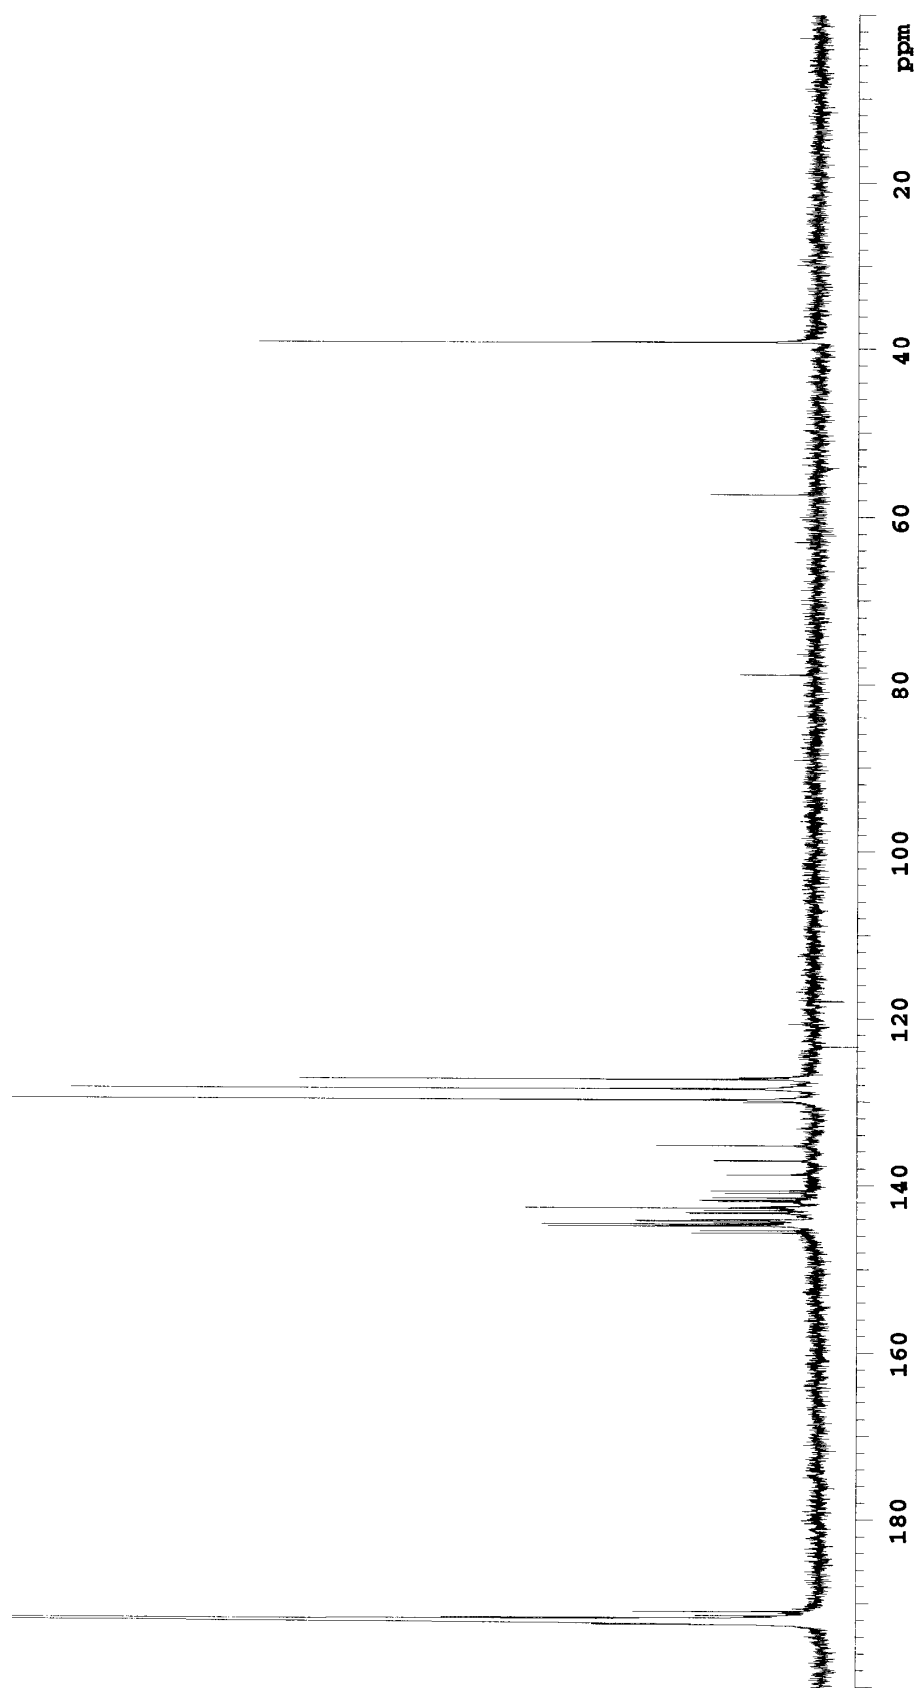

## Mass Spectrometry

### Compound 5a

(modified after loading)  
Bucky LC-MS Positive APCI Mode

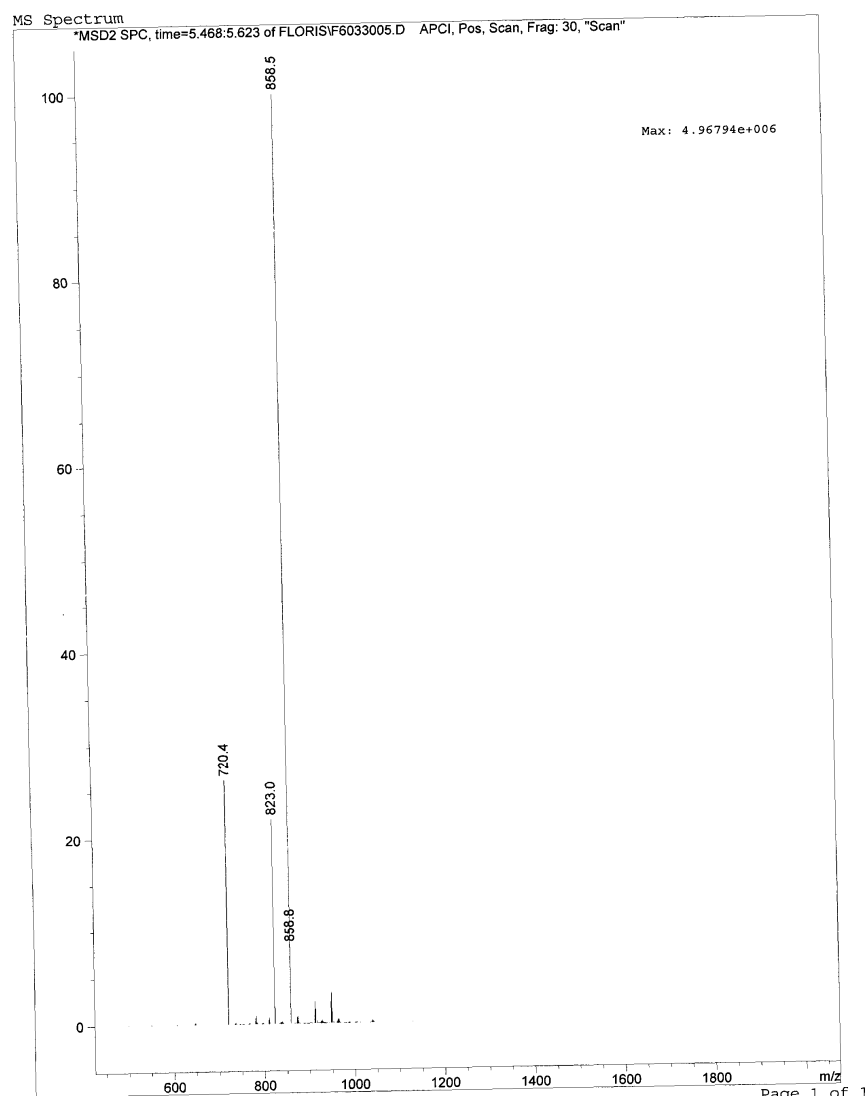



## Compound 5b

Print of window 80: MS Spectrum

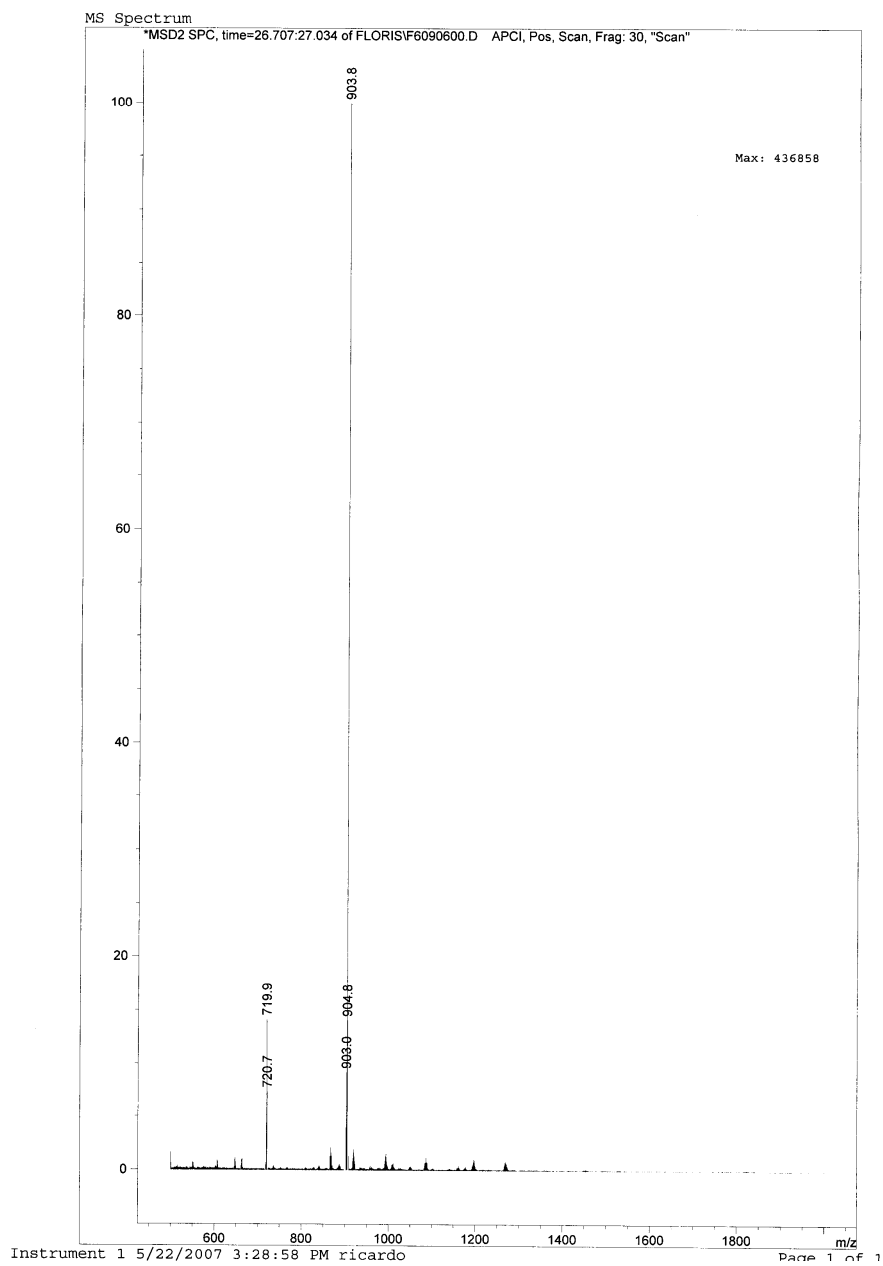

### Compound 6a

Bucky LC-MS Positive APCI Mode

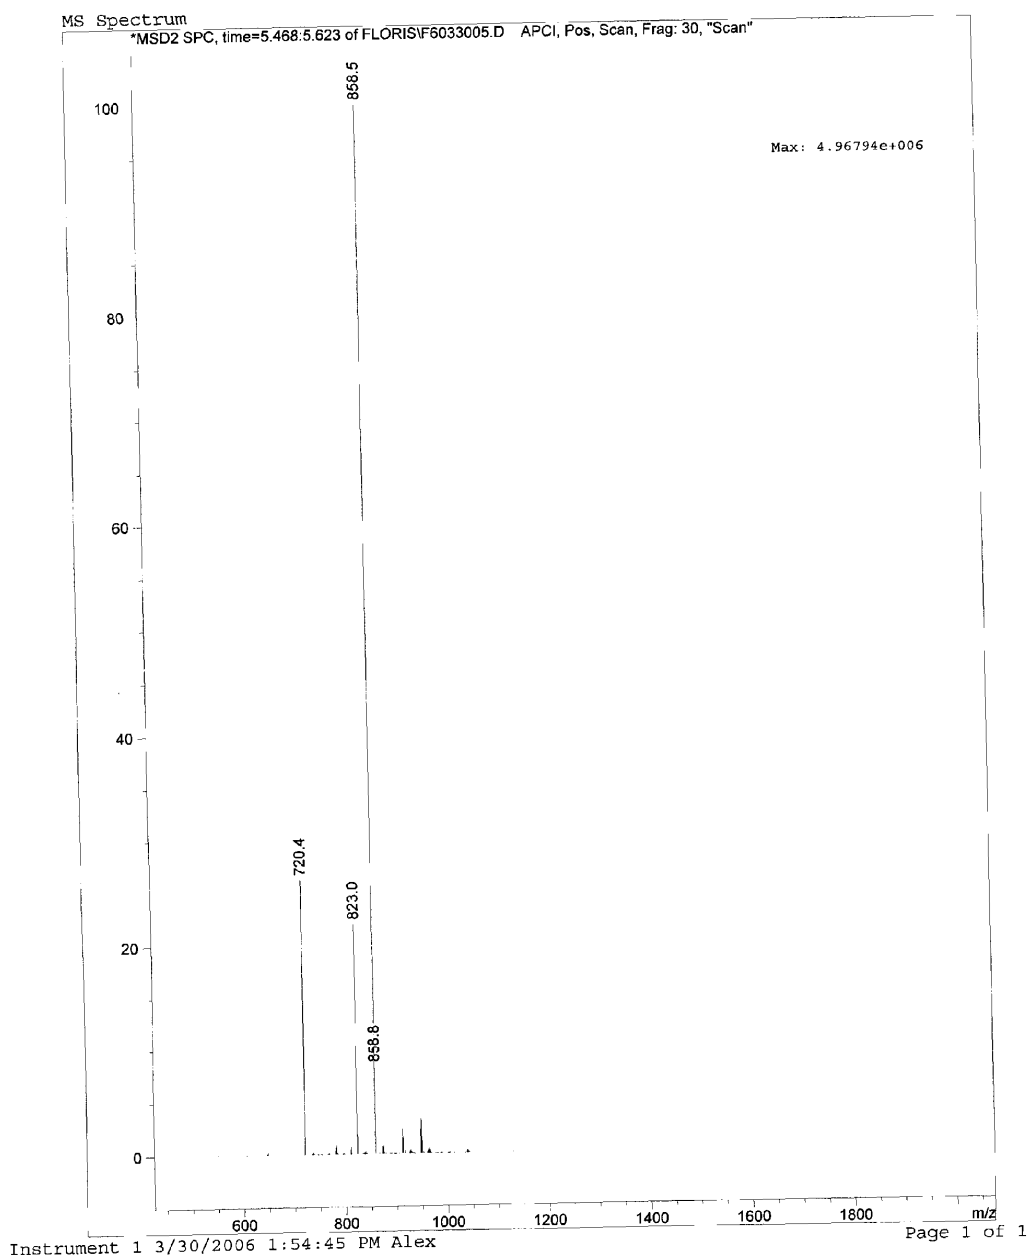

### Compound 6b

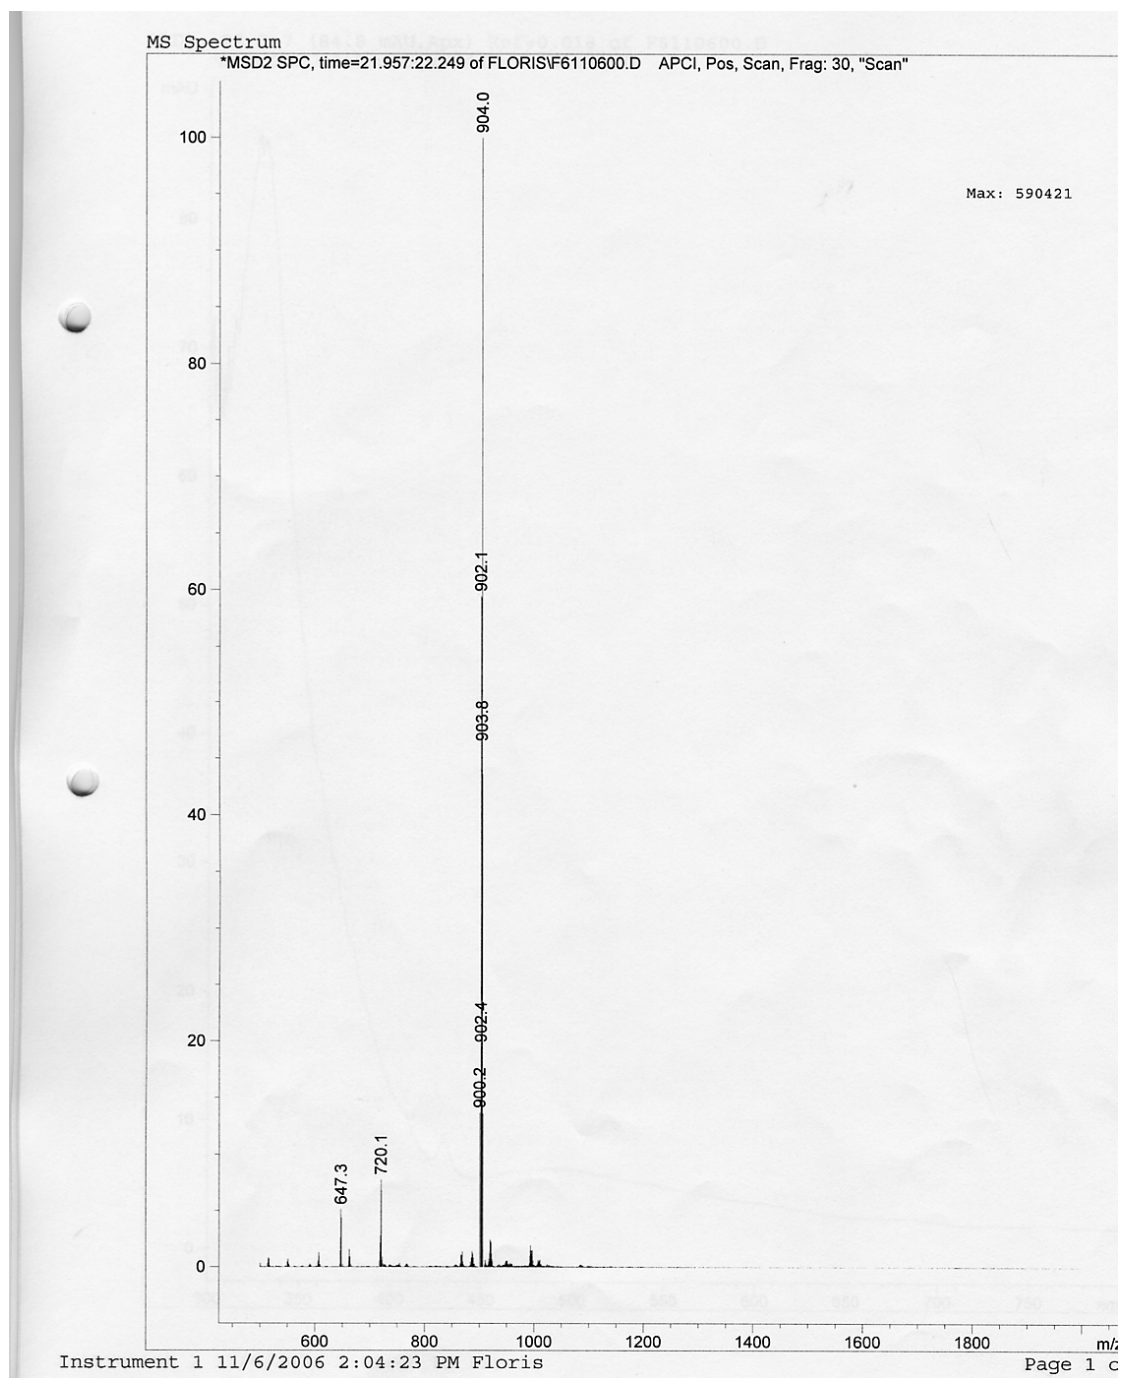

## Compound 7a

of window 80: MS Spectrum

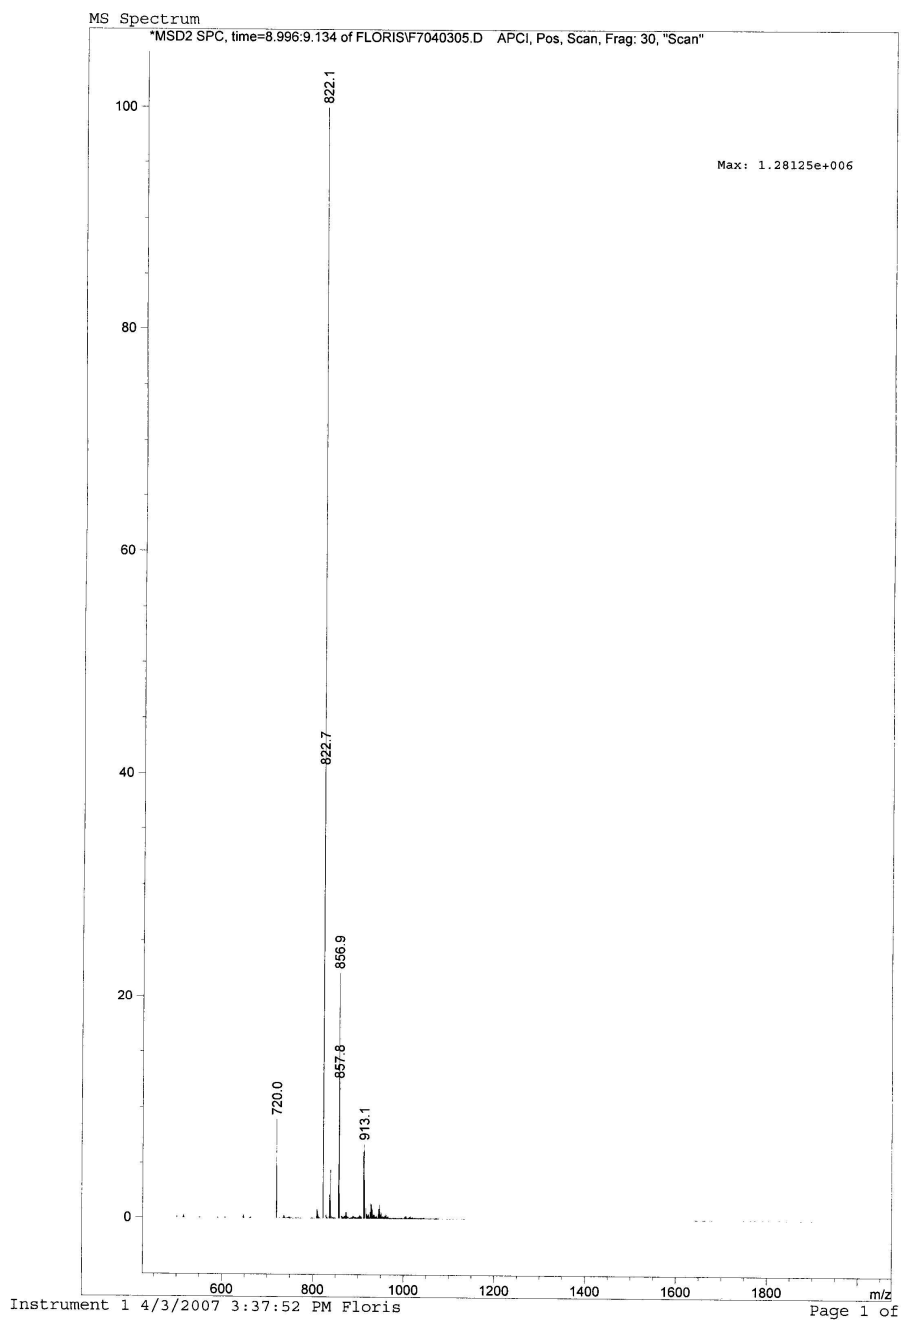

## Compound 7b

of window 80: MS Spectrum

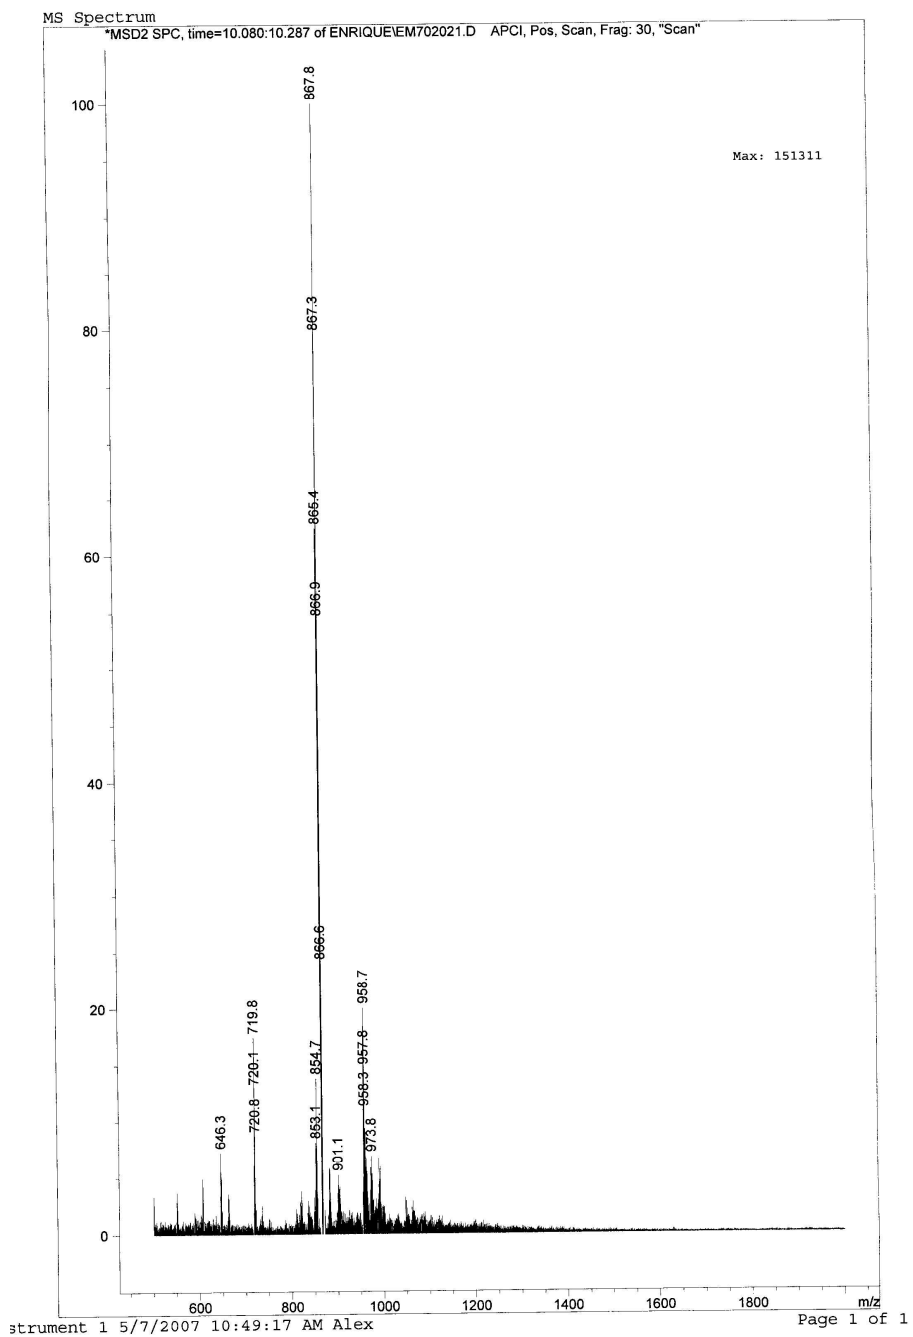

## Compound 8a

Bucky LC-MS Positive APCI Mode

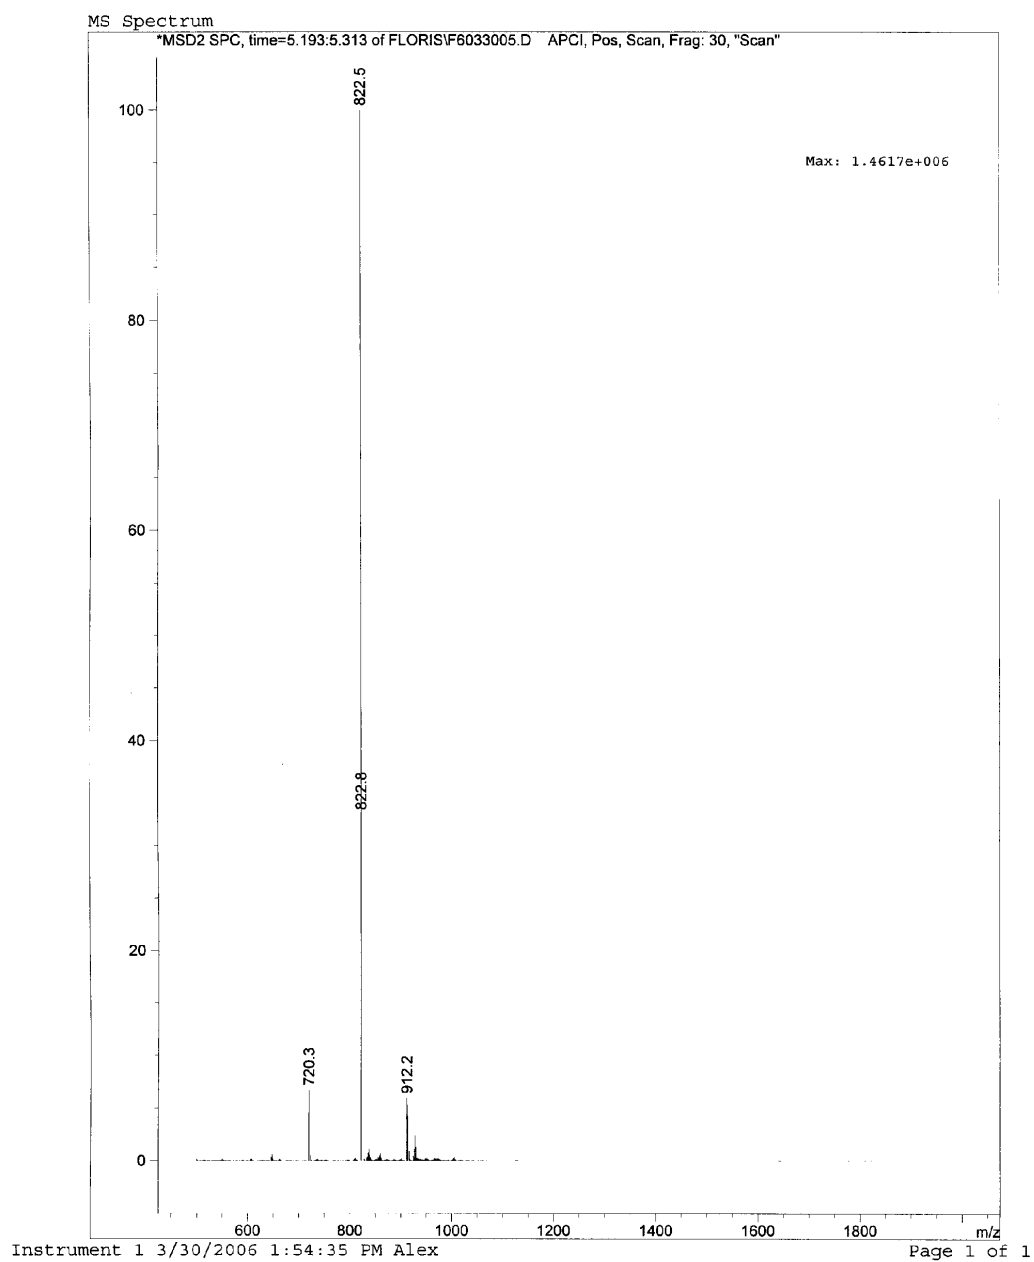

### Compound 8b

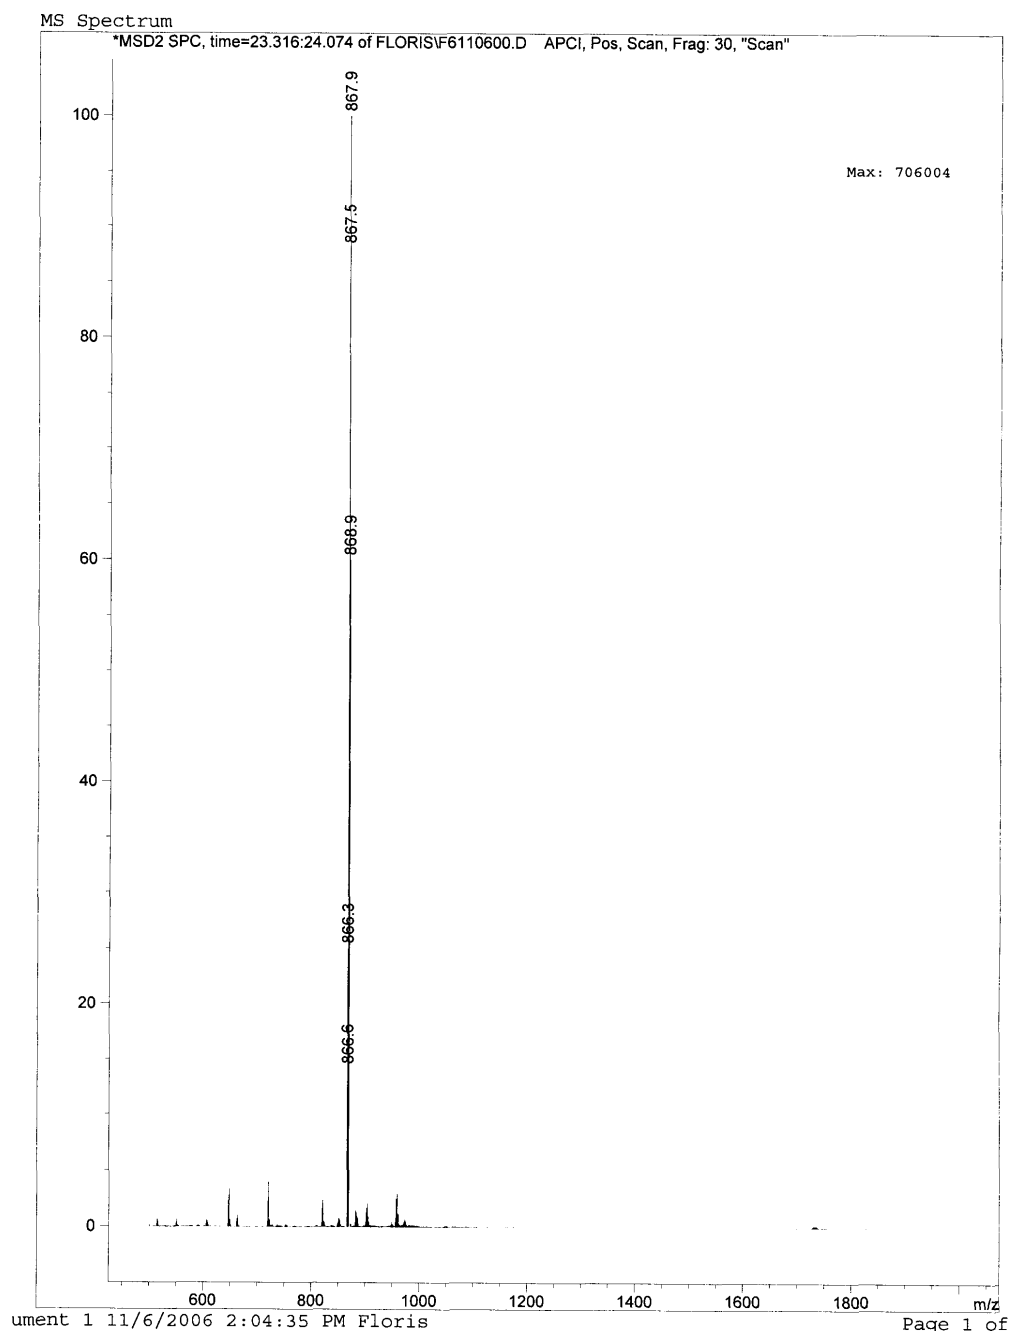

Supplement: b920339g.pdf [file b920339g.pdf]
